# Supplementary material for: Conversion of CO2 to gasoline over tandem Fe/C and HZSM-5 catalysts
Source: Royal Society of Chemistry journal article supplement (doi:10.1039/d2se01567f), 2023-01-01
Supplement: d2se01567f1.pdf [file d2se01567f1.pdf]

## Supporting Information

### **Conversion of CO<sub>2</sub> hydrogenation to gasoline over tandem Fe/C and HZSM-5 catalysts**

Ke Jin<sup>a,c</sup>, Chengyan Wen<sup>b</sup>, Qian Jiang<sup>a</sup>, Xiuzheng Zhuang<sup>b</sup>, Lungang Chen<sup>b</sup>, Longlong Ma<sup>b</sup>, Chenguang Wang<sup>a,c\*</sup>, Qi Zhang<sup>b\*</sup>

a CAS Key Laboratory of Renewable Energy, Guangzhou Institute of Energy Conversion, Chinese Academy of Sciences, Guangzhou 510640, China

b Key Laboratory of Energy Thermal Conversion and Control of Ministry of Education, School of Energy and Environment, Southeast University, Nanjing 210096, China

c University of Chinese Academy of Sciences, Beijing 100049, China

\* Corresponding author.

zhangqiseu@seu.edu.cn. (Qi zhang) and wangcgc@ms.giec.ac.cn. (Chenguang Wang)

**Table S1** Summary of iron-based catalysts for CO<sub>2</sub> hydrogenation to gasoline.

| Catalyst                                            | T (°C)     | P (MPa)  | CO <sub>2</sub> conversion (%) | CO selectivity (%) | C <sub>5</sub> -C <sub>11</sub> sel. (%) | STY <sub>GL</sub> (μmol <sub>CO2</sub> g <sub>Fe</sub> <sup>-1</sup> s <sup>-1</sup> ) | Lifetime (h) | Ref.             |
|-----------------------------------------------------|------------|----------|--------------------------------|--------------------|------------------------------------------|----------------------------------------------------------------------------------------|--------------|------------------|
| Fe-Zn-Zr/HZSM-5                                     | 360        | 5        | 19.5                           | 57.4               | 52c                                      | 8.4                                                                                    | 6            | [1]              |
| Fe-Ce/KY                                            | 300        | 10       | 20.1                           | 34.6               | 49.6c                                    | 1.7                                                                                    | -            | [2]              |
| Fe/RbY                                              | 300        | 1        | 17.2                           | 31.6               | 54.4c                                    | 2                                                                                      | 24           | [3]              |
| Fe-Cu-Na/HZSM-5                                     | 250        | 2        | 12.3                           | 19.6               | 29.2c                                    | 1.6                                                                                    | -            | [4]              |
| Fe-Zn-Zr/HY                                         | 340        | 5        | 22.4                           | 50.4               | 14.3c                                    | 0.5                                                                                    | -            | [5]              |
| Na-Fe/HZSM-5                                        | 340        | 1        | 30.9                           | 26.4               | 44.3c                                    | 2.9                                                                                    | 40           | [6]              |
| Fe-K/a-Al <sub>2</sub> O <sub>3</sub> &P/ZSM-5      | 400        | 3        | 36.4                           | 10.2               | 49.6c                                    | 22.3                                                                                   | -            | [7]              |
| Na-Fe <sub>3</sub> O <sub>4</sub> /HZSM-5 (25)-Si-1 | 320        | 2        | 28.5                           | 15                 | 61.1c                                    | 2.3                                                                                    | 50           | [8]              |
| K-Fe/C-K+ZSM-5                                      | 320        | 2.5      | 34.5                           | 18.8               | 70.1c                                    | 8.1                                                                                    | 40           | [9]              |
| Na-Fe <sub>3</sub> O <sub>4</sub> /HY               | 320        | 3        | 34.1                           | 13.7               | 47.9                                     | 4.5                                                                                    | -            | [10]             |
| Na-Fe <sub>3</sub> O <sub>4</sub> /HZSM-5           | 320        | 3        | 26.8                           | 19.8               | 64.3                                     | 4.4                                                                                    | >180         | [10]             |
| Na-Fe <sub>3</sub> O <sub>4</sub> /HMCM-22          | 320        | 3        | 34.8                           | 13.4               | 56.8                                     | 5.4                                                                                    | <12          | [11]             |
| <b>Fe/C HZSM-5</b>                                  | <b>320</b> | <b>2</b> | <b>31.9</b>                    | <b>34.6</b>        | <b>58.6</b>                              | <b>91.2</b>                                                                            | <b>180</b>   | <b>This work</b> |

c C<sub>5</sub><sup>+</sup> sel. (%).

## References

- [1] Tan Y, Fujiwara M, Ando H, Xu Q, Souma Y. Syntheses of isobutane and branched higher hydrocarbons from carbon dioxide and hydrogen over composite catalysts. *Ind Eng Chem Res* 1999;38(9):3225-9.
- [2] Nam S-S, Kishan G, Lee M-W, Choi M-J, Lee K-W. Selective Synthesis of C<sub>2</sub>-C<sub>4</sub> Olefins and C<sub>5</sub><sup>+</sup> Hydrocarbons over Unpromoted and Cerium-promoted Iron Catalysts Supported on Ion Exchanged (H, K) Zeolite-Y. *J Chem Res(S)* 1999;5:344-5.
- [3] Nam S-S, Kim H, Kishan G, Choi M-J, Lee K-W. Catalytic conversion of carbon dioxide into hydrocarbons over iron supported on alkali ion-exchanged Y-zeolite catalysts. *Appl Catal, A* 1999;179:155-63.

- [4] Xu Q, He D, Fujiwara M, Tanaka M, Souma Y, Yamanaka H. Hydrogenation of carbon dioxide over Fe–Cu–Na zeolite composite catalysts: Na migration via solid–solid reaction and its effects on the catalytic activity. *J Mol Catal A: Chem* 1998;136:161–8.
- [5] Rongxian B, Yisheng T, Yizhuo H. Study on the carbon dioxide hydrogenation to iso-alkanes over Fe–Zn–M/zeolite composite catalysts. *Fuel Process Technol* 2004;86(3):293-301.
- [6] Xu Y, Shi C, Liu B, Wang T, Zheng J, Li W, et al. Selective production of aromatics from CO<sub>2</sub>. *Catal Sci Technol* 2019;9(3):593-610.
- [7] Dai C, Zhao X, Hu B, Zhang J, Hao Q, Chen H, et al. Hydrogenation of CO<sub>2</sub> to Aromatics over Fe–K/Alkaline Al<sub>2</sub>O<sub>3</sub> and P/ZSM-5 Tandem Catalysts. *Ind Eng Chem Res* 2020;59(43):19194-202.
- [8] Wei J, Yao R, Ge Q, Xu D, Fang C, Zhang J, et al. Precisely regulating Brønsted acid sites to promote the synthesis of light aromatics via CO<sub>2</sub> hydrogenation. *Appl Catal, B* 2021;283:119648.
- [9] Guo L, Sun S, Li J, Gao W, Zhao H, Zhang B, et al. Boosting liquid hydrocarbons selectivity from CO<sub>2</sub> hydrogenation by facilely tailoring surface acid properties of zeolite via a modified Fischer-Tropsch synthesis. *Fuel* 2021;306.
- [10] Wei J, Ge Q, Yao R, Wen Z, Fang C, Guo L, et al. Directly converting CO<sub>2</sub> into a gasoline fuel. *Nat Commun* 2017;8:15174.
- [11] Wei J, Yao R, Ge Q, Wen Z, Ji X, Fang C, et al. Catalytic Hydrogenation of CO<sub>2</sub> to Isoparaffins over Fe-Based Multifunctional Catalysts. *ACS Catal* 2018;8(11):9958-67.
